# Supplementary material for: Reanalysis of the anthrax epidemic in Rhodesia, 1978–1984
Source: PeerJ. 2016 Nov 10;4:e2686. doi: 10.7717/peerj.2686 (PMC5111893; doi:10.7717/peerj.2686)
Supplement: Supplemental Information 1 [file peerj-04-2686-s001.xlsx]

## Sheet: Rhodesia natl level hu anthrax
	Human Anthrax Cases
Year	Cases	Deaths
1926	1	0
1927	1	0
1928	0	0
1929	0	0
1930	0	0
1931	0	0
1932	3	0
1933	0	0
1934	0	0
1935	3	0
1936	0	0
1937	0	0
1938	14	4
1939	0	0
1940	0	0
1941	0	0
1942	0	0
1943	0	0
1944	0	0
1945	3	0
1950	6	0
1951	5	0
1952	4	0
1953	2	0
1954	27	4
1955	0	0
1956	0	0
1957	0	0
1958	5	0
1959	15	1
1960	0	0
1961	0	0
1962	1	0
1963	1	0
1964	0	0
1965	65	3
1966	17	1
1967	86	6
1968	8	0
1969	1	0
1970	11	0
1971	3	1
1972	0	0
1973	0	0
1974	0	0
1975	0	0
1976	29	0
1977	11	0
1978
1979	7850	47
1980	9218	54
1981

## Sheet: provincial data
Date	Facility	City	Province	Human Anthrax Cases
1979-06-01		Belingwe	Midlands Province	0
1979-07-01		Belingwe	Midlands Province	0
1979-08-01		Belingwe	Midlands Province	0
1979-09-01		Belingwe	Midlands Province	0
1979-10-01		Belingwe	Midlands Province	0
1979-11-01		Belingwe	Midlands Province	0
1979-12-01		Belingwe	Midlands Province	0
1980-01-01		Belingwe	Midlands Province	0
1980-02-01		Belingwe	Midlands Province	1
1980-03-01		Belingwe	Midlands Province	0
1980-04-01		Belingwe	Midlands Province	0
1980-05-01		Belingwe	Midlands Province	0
1980-06-01		Belingwe	Midlands Province	0
1980-07-01		Belingwe	Midlands Province	0
1980-08-01		Belingwe	Midlands Province	0
1980-09-01		Belingwe	Midlands Province	0
1980-10-01		Belingwe	Midlands Province	0
1979-06-01		Charter	Midlands Province	0
1979-07-01		Charter	Midlands Province	0
1979-08-01		Charter	Midlands Province	0
1979-09-01		Charter	Midlands Province	0
1979-10-01		Charter	Midlands Province	0
1979-11-01		Charter	Midlands Province	0
1979-12-01		Charter	Midlands Province	0
1980-01-01		Charter	Midlands Province	3
1980-02-01		Charter	Midlands Province	1
1980-03-01		Charter	Midlands Province	3
1980-04-01		Charter	Midlands Province	4
1980-05-01		Charter	Midlands Province	3
1980-06-01		Charter	Midlands Province	0
1980-07-01		Charter	Midlands Province	0
1980-08-01		Charter	Midlands Province	0
1980-09-01		Charter	Midlands Province	0
1980-10-01		Charter	Midlands Province	0
1979-06-01		Chilimanzi	Midlands Province	0
1979-07-01		Chilimanzi	Midlands Province	0
1979-08-01		Chilimanzi	Midlands Province	0
1979-09-01		Chilimanzi	Midlands Province	0
1979-10-01		Chilimanzi	Midlands Province	0
1979-11-01		Chilimanzi	Midlands Province	0
1979-12-01		Chilimanzi	Midlands Province	0
1980-01-01		Chilimanzi	Midlands Province	0
1980-02-01		Chilimanzi	Midlands Province	0
1980-03-01		Chilimanzi	Midlands Province	1
1980-04-01		Chilimanzi	Midlands Province	0
1980-05-01		Chilimanzi	Midlands Province	0
1980-06-01		Chilimanzi	Midlands Province	0
1980-07-01		Chilimanzi	Midlands Province	0
1980-08-01		Chilimanzi	Midlands Province	0
1980-09-01		Chilimanzi	Midlands Province	0
1980-10-01		Chilimanzi	Midlands Province	1
1979-06-01		Gwelo	Midlands Province	0
1979-07-01		Gwelo	Midlands Province	0
1979-08-01		Gwelo	Midlands Province	0
1979-09-01		Gwelo	Midlands Province	0
1979-10-01		Gwelo	Midlands Province	0
1979-11-01		Gwelo	Midlands Province	0
1979-12-01		Gwelo	Midlands Province	2
1980-01-01		Gwelo	Midlands Province	1
1980-02-01		Gwelo	Midlands Province	0
1980-03-01		Gwelo	Midlands Province	0
1980-04-01		Gwelo	Midlands Province	0
1980-05-01		Gwelo	Midlands Province	2
1980-06-01		Gwelo	Midlands Province	0
1980-07-01		Gwelo	Midlands Province	0
1980-08-01		Gwelo	Midlands Province	0
1980-09-01		Gwelo	Midlands Province	0
1980-10-01		Gwelo	Midlands Province	4
1979-06-01		Gokwe	Midlands Province	0
1979-07-01		Gokwe	Midlands Province	0
1979-08-01		Gokwe	Midlands Province	0
1979-09-01		Gokwe	Midlands Province	0
1979-10-01		Gokwe	Midlands Province	0
1979-11-01		Gokwe	Midlands Province	3
1979-12-01		Gokwe	Midlands Province	3
1980-01-01		Gokwe	Midlands Province	0
1980-02-01		Gokwe	Midlands Province	2
1980-03-01		Gokwe	Midlands Province	9
1980-04-01		Gokwe	Midlands Province	13
1980-05-01		Gokwe	Midlands Province	4
1980-06-01		Gokwe	Midlands Province	7
1980-07-01		Gokwe	Midlands Province	3
1980-08-01		Gokwe	Midlands Province	4
1980-09-01		Gokwe	Midlands Province	6
1980-10-01		Gokwe	Midlands Province	26
1979-06-01		Que Que	Midlands Province	20
1979-07-01		Que Que	Midlands Province	2
1979-08-01		Que Que	Midlands Province	21
1979-09-01		Que Que	Midlands Province	257
1979-10-01		Que Que	Midlands Province	941
1979-11-01		Que Que	Midlands Province	912
1979-12-01		Que Que	Midlands Province	1087
1980-01-01		Que Que	Midlands Province	856
1980-02-01		Que Que	Midlands Province	835
1980-03-01		Que Que	Midlands Province	418
1980-04-01		Que Que	Midlands Province	323
1980-05-01		Que Que	Midlands Province	344
1980-06-01		Que Que	Midlands Province	262
1980-07-01		Que Que	Midlands Province	21
1980-08-01		Que Que	Midlands Province	144
1980-09-01		Que Que	Midlands Province	42
1980-10-01		Que Que	Midlands Province	6
1979-06-01		Selukwe	Midlands Province	0
1979-07-01		Selukwe	Midlands Province	0
1979-08-01		Selukwe	Midlands Province	0
1979-09-01		Selukwe	Midlands Province	0
1979-10-01		Selukwe	Midlands Province	0
1979-11-01		Selukwe	Midlands Province	0
1979-12-01		Selukwe	Midlands Province	0
1980-01-01		Selukwe	Midlands Province	0
1980-02-01		Selukwe	Midlands Province	0
1980-03-01		Selukwe	Midlands Province	1
1980-04-01		Selukwe	Midlands Province	0
1980-05-01		Selukwe	Midlands Province	0
1980-06-01		Selukwe	Midlands Province	0
1980-07-01		Selukwe	Midlands Province	0
1980-08-01		Selukwe	Midlands Province	1
1980-09-01		Selukwe	Midlands Province	0
1980-10-01		Selukwe	Midlands Province	6
1979-06-01		Shabani	Midlands Province	1
1979-07-01		Shabani	Midlands Province	0
1979-08-01		Shabani	Midlands Province	0
1979-09-01		Shabani	Midlands Province	0
1979-10-01		Shabani	Midlands Province	0
1979-11-01		Shabani	Midlands Province	0
1979-12-01		Shabani	Midlands Province	0
1980-01-01		Shabani	Midlands Province	0
1980-02-01		Shabani	Midlands Province	0
1980-03-01		Shabani	Midlands Province	0
1980-04-01		Shabani	Midlands Province	0
1980-05-01		Shabani	Midlands Province	1
1980-06-01		Shabani	Midlands Province	0
1980-07-01		Shabani	Midlands Province	1
1980-08-01		Shabani	Midlands Province	1
1980-09-01		Shabani	Midlands Province	0
1980-10-01		Shabani	Midlands Province	0
1980-01-01	Beatrice Road Infectious Diseases Hospital	Harare
1980-02-01	Beatrice Road Infectious Diseases Hospital	Harare
1980-03-01	Beatrice Road Infectious Diseases Hospital	Harare
1980-04-01	Beatrice Road Infectious Diseases Hospital	Harare
1980-05-01	Beatrice Road Infectious Diseases Hospital	Harare
1980-06-01	Beatrice Road Infectious Diseases Hospital	Harare
1980-07-01	Beatrice Road Infectious Diseases Hospital	Harare
1980-08-01	Beatrice Road Infectious Diseases Hospital	Harare
1980-09-01	Beatrice Road Infectious Diseases Hospital	Harare
1980-10-01	Beatrice Road Infectious Diseases Hospital	Harare
1980-11-01	Beatrice Road Infectious Diseases Hospital	Harare
1980-12-01	Beatrice Road Infectious Diseases Hospital	Harare
1981-01-01	Beatrice Road Infectious Diseases Hospital	Harare
1981-02-01	Beatrice Road Infectious Diseases Hospital	Harare
1981-03-01	Beatrice Road Infectious Diseases Hospital	Harare
1981-04-01	Beatrice Road Infectious Diseases Hospital	Harare
1981-05-01	Beatrice Road Infectious Diseases Hospital	Harare
1981-06-01	Beatrice Road Infectious Diseases Hospital	Harare
1981-07-01	Beatrice Road Infectious Diseases Hospital	Harare
1981-08-01	Beatrice Road Infectious Diseases Hospital	Harare
1981-09-01	Beatrice Road Infectious Diseases Hospital	Harare
1981-10-01	Beatrice Road Infectious Diseases Hospital	Harare
1981-11-01	Beatrice Road Infectious Diseases Hospital	Harare
1981-12-01	Beatrice Road Infectious Diseases Hospital	Harare
1982-01-01	Beatrice Road Infectious Diseases Hospital	Harare
1982-02-01	Beatrice Road Infectious Diseases Hospital	Harare
1982-03-01	Beatrice Road Infectious Diseases Hospital	Harare
1982-04-01	Beatrice Road Infectious Diseases Hospital	Harare
1982-05-01	Beatrice Road Infectious Diseases Hospital	Harare
1982-06-01	Beatrice Road Infectious Diseases Hospital	Harare
1979-01-01			Matabeleland	15
1979-02-01			Matabeleland	12
1979-03-01			Matabeleland	30
1979-04-01			Matabeleland	12
1979-05-01			Matabeleland	9
1979-06-01			Matabeleland	38
1979-07-01			Matabeleland	40
1979-08-01			Matabeleland	9
1979-09-01			Matabeleland	112
1979-10-01			Matabeleland	84
1979-11-01			Matabeleland	667
1979-12-01			Matabeleland	130
1980-01-01			Matabeleland	99
1980-02-01			Matabeleland	142
1980-03-01			Matabeleland	127
1980-04-01			Matabeleland	71
1980-05-01			Matabeleland	78
1980-06-01			Matabeleland	78
1980-07-01			Matabeleland	68
1980-08-01			Matabeleland	51
1980-09-01			Matabeleland	90
1980-10-01			Matabeleland	101
1980-11-01			Matabeleland
1980-12-01			Matabeleland
1979-01-01			Midlands	0
1979-02-01			Midlands	0
1979-03-01			Midlands	0
1979-04-01			Midlands	0
1979-05-01			Midlands	0
1979-06-01			Midlands	21
1979-07-01			Midlands	2
1979-08-01			Midlands	21
1979-09-01			Midlands	257
1979-10-01			Midlands	941
1979-11-01			Midlands	915
1979-12-01			Midlands	1092
1980-01-01			Midlands	860
1980-02-01			Midlands	838
1980-03-01			Midlands	432
1980-04-01			Midlands	340
1980-05-01			Midlands	354
1980-06-01			Midlands	269
1980-07-01			Midlands	25
1980-08-01			Midlands	150
1980-09-01			Midlands	48
1980-10-01			Midlands	43
1980-11-01			Midlands
1980-12-01			Midlands
1979-01-01			Mashonaland
1979-02-01			Mashonaland
1979-03-01			Mashonaland
1979-04-01			Mashonaland
1979-05-01			Mashonaland
1979-06-01			Mashonaland
1979-07-01			Mashonaland
1979-08-01			Mashonaland
1979-09-01			Mashonaland	2
1979-10-01			Mashonaland	58
1979-11-01			Mashonaland	121
1979-12-01			Mashonaland	13
1980-01-01			Mashonaland	168
1980-02-01			Mashonaland	339
1980-03-01			Mashonaland	94
1980-04-01			Mashonaland	48
1980-05-01			Mashonaland	59
1980-06-01			Mashonaland	50
1980-07-01			Mashonaland	50
1980-08-01			Mashonaland	20
1980-09-01			Mashonaland	51
1980-10-01			Mashonaland	73
1980-11-01			Mashonaland	130
1980-12-01			Mashonaland	512
1979-11-01	Mrewa District Hospital	Mrewa District	Mashonaland	2
1979-12-01	Mrewa District Hospital	Mrewa District	Mashonaland	28
1980-01-01	Mrewa District Hospital	Mrewa District	Mashonaland	78
1980-02-01	Mrewa District Hospital	Mrewa District	Mashonaland	112
1980-03-01	Mrewa District Hospital	Mrewa District	Mashonaland	35
1980-04-01	Mrewa District Hospital	Mrewa District	Mashonaland	25
1980-05-01	Mrewa District Hospital	Mrewa District	Mashonaland	18
1980-06-01	Mrewa District Hospital	Mrewa District	Mashonaland	28
1980-07-01	Mrewa District Hospital	Mrewa District	Mashonaland	16
1980-08-01	Mrewa District Hospital	Mrewa District	Mashonaland	54
1980-09-01	Mrewa District Hospital	Mrewa District	Mashonaland	94
1980-10-01	Mrewa District Hospital	Mrewa District	Mashonaland	104
1980-11-01	Mrewa District Hospital	Mrewa District	Mashonaland	126
1980-12-01	Mrewa District Hospital	Mrewa District	Mashonaland	169

## Sheet: point coordinates
ID	Date	Lat	Long
1	1978-11-01	-18.9994	28.9012
2	1978-12-01	-18.7981	28.6711
3	1979-03-01	-20.1329	28.63
4	1979-06-01	-20.3333	30.0333
5	1979-06-01	-18.9208	29.8264
6	1979-08-01	-18.9299	27.7596
7	1979-09-01	-18.9811	29.297
8	1979-09-01	-18.3307	29.913
9	1979-09-01	-17.9514	29.3058
10	1979-10-01	-20.3333	28.9167
11	1979-10-01	-18.7576	30.9375
12	1979-10-01	-18.4691	29.4448
13	1979-10-01	-18.2168	28.9335
14	1979-10-01	-17.3828	30.3385
15	1979-10-01	-17.3658	30.1963
16	1979-11-01	-20.5359	29.2826
17	1979-11-01	-20	28.9333
18	1979-11-01	-19.6451	31.2184
19	1979-11-01	-18.5284	32.126
20	1979-11-01	-17.6583	31.7793
21	1979-11-01	-17.2988	31.5637
22	1979-12-01	-20.4238	32.7034
23	1979-12-01	-19.4614	29.8022
24	1979-12-01	-18.6101	31.5781
25	1979-12-01	-18.5677	30.6782
26	1979-12-01	-18.1374	30.148
27	1980-01-01	-19.3328	31.4344
28	1980-01-01	-18.1929	31.542
29	1980-01-01	-17.8577	31.3937
30	1980-01-01	-17.5072	30.9759
31	1980-01-01	-17.4404	30.0032
32	1980-01-01	-17.3727	30.9506
33	1980-01-01	-17.29	31.4587
34	1980-02-01	-20.945	29.025
35	1980-02-01	-20.9167	28.4667
36	1980-02-01	-20.5496	29.9135
37	1980-02-01	-20.5	27.8
38	1980-03-01	-22.2167	30
39	1980-03-01	-19.7725	27.7554
40	1980-03-01	-19.675	30.0035
41	1980-03-01	-19.5829	30.751
42	1980-03-01	-19.5521	28.6692
43	1980-03-01	-16.7701	31.5792
44	1980-06-01	-20.507	28.436
45	1980-06-01	-18.3647	26.5
46	1980-10-01	-19.8667	28.2667
